# Supplementary material for: Electrodeposition of ultrathin NiBDC lamellar arrays as a novel binder-free electrode for flexible all-solid-state supercapacitors
Source: Royal Society of Chemistry journal article supplement (doi:10.1039/d4nj04206a), 2024-11-27
Supplement: d4nj04206a1.pdf [file d4nj04206a1.pdf]

## Supplementary Information

### Electrodeposition of Ultrathin NiBDC Lamellar Arrays as a Novel Binder-free Electrode for Flexible All-Solid-State Supercapacitors

Yue Feng<sup>1</sup>, Mingji Wu<sup>2</sup>, Haiyan Zhu<sup>1</sup>, Huirong Bao<sup>1</sup>, Cheng Wang<sup>1</sup>, Xiuqing Lin<sup>1</sup>, Ruiqing Liu<sup>1\*</sup>, and Xiaomiao Feng<sup>1\*</sup>

1 Key Laboratory for Organic Electronics and Information Displays & Institute of Advanced Materials (IAM), School of Materials Science & Engineering, Nanjing University of Posts and Telecommunications, Nanjing 210023, China

2 Aerospace Newsky Technology Co. Ltd. Wuxi 214062, China

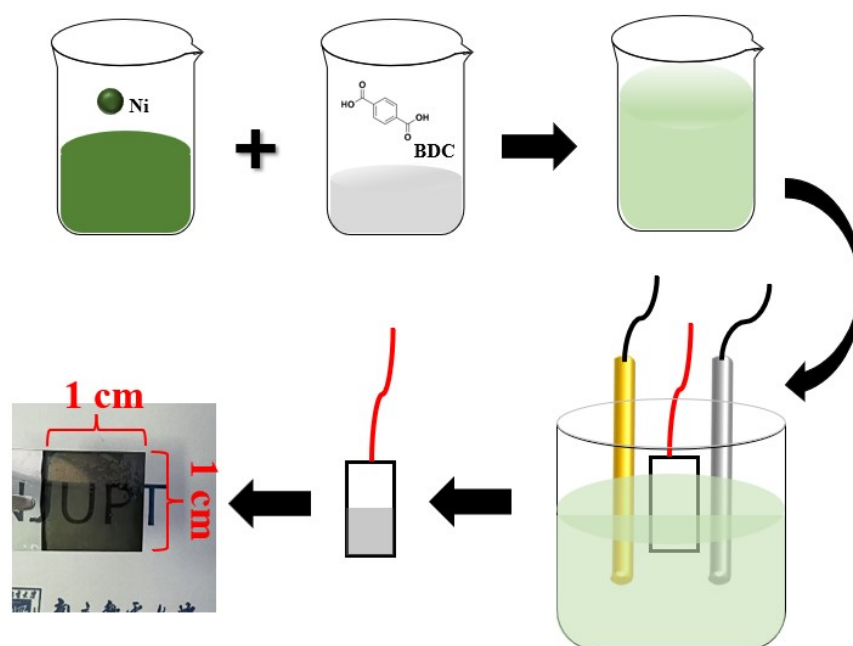

Scheme S1. Schematic illustration of the synthetic process of NiBDC/ITO/PET.

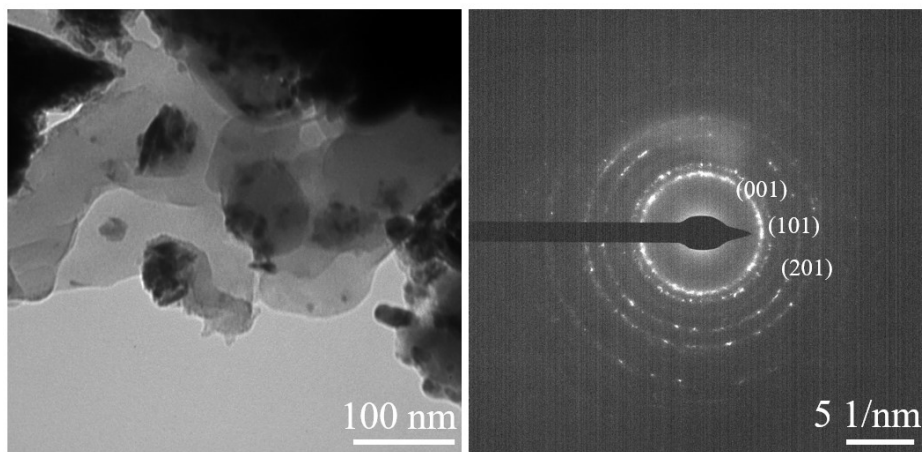

Fig. S1. TEM images of NiBDC/ITO/PET-30 and the corresponding SAED pattern of NiBDC/ITO/PET-30.

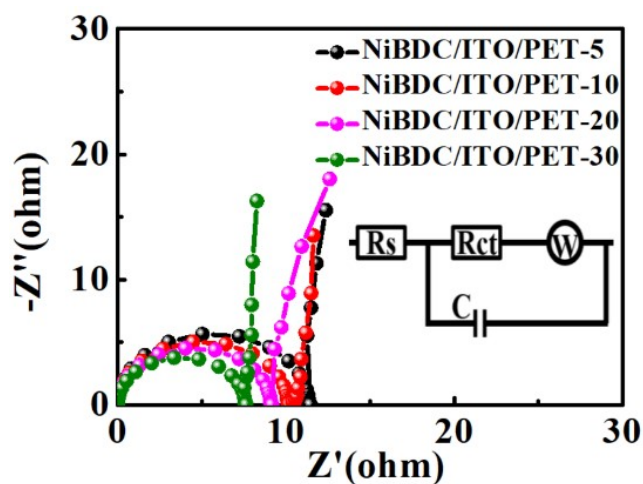

Fig. S2. Fitted Nyquist plots of NiBDC/ITO/PET-5, NiBDC/ITO/PET-10, NiBDC/ITO/PET-20, and NiBDC/ITO/PET-30.

Table S1:  $R_s$  and  $R_{ct}$  values of NiBDC/ITO/PET-5, NiBDC/ITO/PET-10, NiBDC/ITO/PET-20 and NiBDC/ITO/PET-30.

|          | NiBDC/ITO/PET-5 | NiBDC/ITO/PET-10 | NiBDC/ITO/PET-20 | NiBDC/ITO/PET-30 |
|----------|-----------------|------------------|------------------|------------------|
| $R_s$    | 11.45           | 10.13            | 9.76             | 7.58             |
| $R_{ct}$ | 10.80           | 8.97             | 9.34             | 8.94             |

Table S2: The areal capacitance of the NiBDC/ITO/PET-30 at different scan rates.

| Scan rate<br>( $\text{mV s}^{-1}$ )                  | 10   | 20   | 30   | 40   | 50   | 80   | 100  | 150  |
|------------------------------------------------------|------|------|------|------|------|------|------|------|
| Capacitance <sub>cv</sub><br>( $\text{mF cm}^{-2}$ ) | 74.1 | 55.8 | 43.7 | 32.5 | 28.4 | 25.3 | 14.4 | 12.6 |

Table S3: The areal capacitance of the NiBDC/ITO/PET-30 at different current densities.

|                                                      |      |      |     |     |     |     |
|------------------------------------------------------|------|------|-----|-----|-----|-----|
| Current density<br>( $\mu\text{A cm}^{-2}$ )         | 50   | 100  | 150 | 200 | 300 | 500 |
| Capacitance <sub>cp</sub><br>( $\text{mF cm}^{-2}$ ) | 72.2 | 28.9 | 9.8 | 8.9 | 8.7 | 4.3 |

Table S4: The areal capacitance of the NiBDC/ITO/PET-30//NiBDC/ITO/PET-30 symmetric supercapacitor at different scan rates.

|                                                      |      |      |      |      |      |      |      |
|------------------------------------------------------|------|------|------|------|------|------|------|
| Scan rate<br>( $\text{mV s}^{-1}$ )                  | 10   | 20   | 30   | 40   | 50   | 100  | 150  |
| Capacitance <sub>cv</sub><br>( $\text{mF cm}^{-2}$ ) | 39.5 | 36.8 | 34.1 | 25.3 | 23.8 | 22.5 | 20.8 |

Table S5: The specific capacitance of the NiBDC/ITO/PET-30//NiBDC/ITO/PET-30 symmetric supercapacitor at different current densities.

|                                                      |      |      |      |      |      |      |
|------------------------------------------------------|------|------|------|------|------|------|
| Current density<br>( $\mu\text{A cm}^{-2}$ )         | 100  | 150  | 200  | 250  | 300  | 500  |
| Capacitance <sub>cp</sub><br>( $\text{mF cm}^{-2}$ ) | 40.8 | 35.4 | 33.5 | 27.1 | 24.6 | 22.2 |

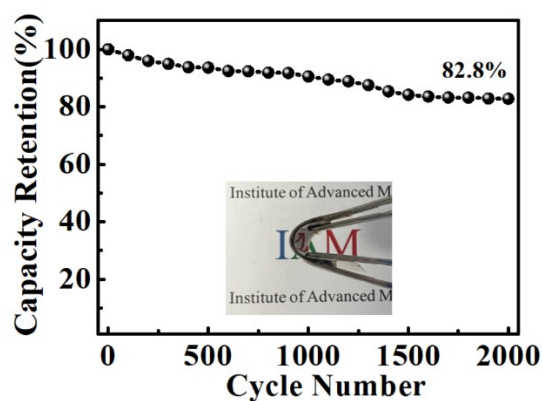

Fig. S3. The long-term cycling performance of the device was evaluated under a bending angle of  $180^\circ$  at a current density of  $0.5 \text{ mA cm}^{-2}$  for 2000 cycles.

Table S6: A comparison table of specific capacitance from the literatures.

| Supercapacitor                        | Specific Capacitance (mF cm <sup>-2</sup> ) | Current Density (mA cm <sup>-2</sup> ) | Ref. |
|---------------------------------------|---------------------------------------------|----------------------------------------|------|
| Cu-HHTP Film                          | 0.939                                       | 0.007                                  | 58   |
| LSG/Ni-CAT MOF                        | 15.2                                        | 0.2                                    | 59   |
| Cu-CAT NWA/PPy                        | 252.1                                       | 1.25                                   | 60   |
| g-C <sub>34</sub> N <sub>6</sub> -COF | 15.2                                        | 2 mV s <sup>-1</sup>                   | 61   |
| Ni <sub>3</sub> (HITP) <sub>2</sub>   | 15.69                                       | 0.1                                    | 62   |
| TiN film                              | 31.2                                        | 2                                      | 63   |
| Ni(OH) <sub>2</sub> /MWCNT/ACG        | 115                                         | 1                                      | 64   |
| NiMnO <sub>3</sub> -rGO@Cotton-Cu     | 13.5                                        | 6                                      | 65   |
| This Work                             | 40.8                                        | 0.1                                    |      |
